# Supplementary material for: A comparison of size exclusion chromatography-based tandem strategies for plasma exosome enrichment and proteomic analysis
Source: Royal Society of Chemistry journal article supplement (doi:10.1039/d3ay01704d), 2023-01-01
Supplement: d3ay01704d1.pdf [file d3ay01704d1.pdf]

## **A Comparison of Size Exclusion Chromatography Based Tandem Strategies for Plasma Exosome Enrichment and Proteomic Analysis**

H. H. Bai <sup>a</sup>, X. F. Wang <sup>b</sup>, B. Y. Zhang <sup>b</sup>, and W. Liu <sup>a\*</sup>

<sup>a</sup> Department of Pharmacy, Beijing YouAn Hospital, Capital Medical University,  
Beijing 100069, PR China

<sup>b</sup> Beijing Shijitan Hospital, Capital Medical University, Beijing 100038, PR China

**\*Corresponding authors:**

\*E-mail: liuwei8090@126.com (W. Liu)

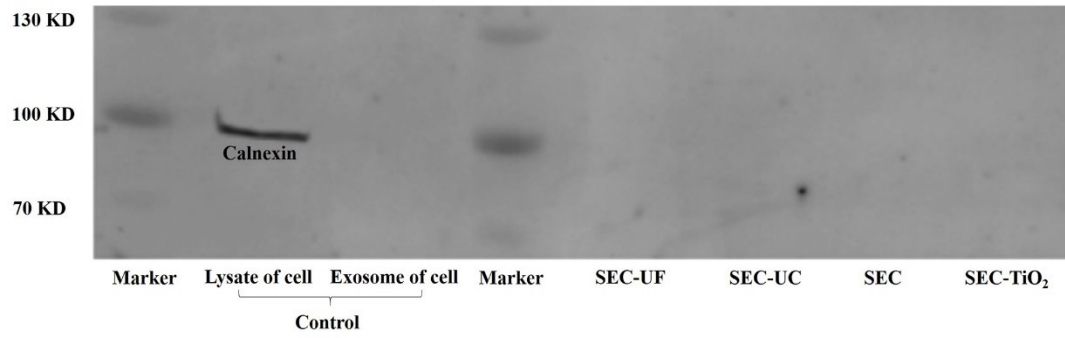

Fig. S1 Western blotting analysis of Calnexin expressions in exosomes isolated by the different techniques. The lysate of A673 cell and the exosomes from A673 cell were used as a control.

Table S1 List of the identified proteins from exosomes of human plasma by using the direct SEC method.

| No. | Protein group | No. | Protein group | No. | Protein group |
|-----|---------------|-----|---------------|-----|---------------|
| 1   | Q8IZJ3        | 40  | Q9H4G4        | 79  | P06753        |
| 2   | Q8IXS2        | 41  | P60900        | 80  | P06681        |
| 3   | P58166        | 42  | P01344        | 81  | Q99523        |
| 4   | Q8NBJ4        | 43  | P80723        | 82  | P01137        |
| 5   | P07900        | 44  | P26022        | 83  | A6NGU5        |
| 6   | Q58FG0        | 45  | P05023        | 84  | P36268        |
| 7   | P29966        | 46  | Q13733        | 85  | P19440        |
| 8   | P08571        | 47  | P54707        | 86  | P49746        |
| 9   | Q9HCL0        | 48  | P50993        | 87  | A0A075B6I7    |
| 10  | Q9H0U4        | 49  | P13637        | 88  | Q9Y6C2        |
| 11  | Q13361        | 50  | A0A0B4J1U3    | 89  | P08575        |
| 12  | P08567        | 51  | P08493        | 90  | A0M8Q6        |
| 13  | Q7L576        | 52  | P07360        | 91  | A0A075B6J1    |
| 14  | Q96F07        | 53  | P11169        | 92  | Q2UY09        |
| 15  | O43707        | 54  | Q8TDB8        | 93  | Q9ULV4        |
| 16  | P12814        | 55  | O14745        | 94  | P15153        |
| 17  | P05787        | 56  | Q00610        | 95  | P02458        |
| 18  | O15400        | 57  | P61586        | 96  | Q9UBQ6        |
| 19  | P61204        | 58  | P08134        | 97  | Q8WUJ3        |
| 20  | P84077        | 59  | P10114        | 98  | A0A0C4DH39    |
| 21  | P84085        | 60  | Q9Y3L5        | 99  | P08709        |
| 22  | P11171        | 61  | P61225        | 100 | P00390        |
| 23  | Q8NG11        | 62  | P07237        | 101 | Q8WWI5        |
| 24  | P62993        | 63  | Q8NBS9        | 102 | P00748        |
| 25  | P55268        | 64  | P02462        | 103 | P16284        |
| 26  | P62942        | 65  | P49257        | 104 | P00751        |
| 27  | Q7Z304        | 66  | P50552        | 105 | Q15063        |
| 28  | Q15762        | 67  | P55103        | 106 | P02753        |
| 29  | P25311        | 68  | Q14766        | 107 | P09172        |
| 30  | P26927        | 69  | A0A0A0MRZ9    | 108 | Q06830        |
| 31  | O00429        | 70  | Q96KN2        | 109 | P05154        |
| 32  | O95819        | 71  | Q9UQP3        | 110 | Q14956        |
| 33  | Q8N4C8        | 72  | P62258        | 111 | P03952        |
| 34  | Q9UKE5        | 73  | Q04917        | 112 | P55072        |
| 35  | P50395        | 74  | Q86YZ3        | 113 | Q14697        |
| 36  | P05362        | 75  | P0DMV8        | 114 | P30101        |
| 37  | P10599        | 76  | P0DMV9        | 115 | Q8IZF2        |
| 38  | P05543        | 77  | P61981        | 116 | Q68DU8        |

|     |               |     |               |     |               |
|-----|---------------|-----|---------------|-----|---------------|
| 39  | Q92187        | 78  | P98160        | 117 | Q96CX2        |
| No. | Protein group | No. | Protein group | No. | Protein group |
| 118 | P35030        | 160 | P13716        | 202 | A0A0C4DH33    |
| 119 | Q9BYJ0        | 161 | P16157        | 203 | P60660        |
| 120 | P16452        | 162 | O15145        | 204 | P40197        |
| 121 | P16150        | 163 | P58335        | 205 | Q99784        |
| 122 | Q5VST9        | 164 | P08185        | 206 | P16070        |
| 123 | P06733        | 165 | Q9NSC7        | 207 | Q9H299        |
| 124 | P05109        | 166 | Q9NZT1        | 208 | Q8WUM4        |
| 125 | P02549        | 167 | P12931        | 209 | Q01518        |
| 126 | Q8WW52        | 168 | Q9HBR0        | 210 | Q04721        |
| 127 | P02461        | 169 | P51693        | 211 | P00451        |
| 128 | P00918        | 170 | P22105        | 212 | Q14515        |
| 129 | P35579        | 171 | Q8N699        | 213 | Q9HBI1        |
| 130 | P17301        | 172 | Q13103        | 214 | P81605        |
| 131 | P06702        | 173 | O75954        | 215 | Q9H6L2        |
| 132 | P35247        | 174 | P01889        | 216 | P13987        |
| 133 | P61221        | 175 | Q03591        | 217 | P33151        |
| 134 | O14950        | 176 | P60033        | 218 | P07437        |
| 135 | P19105        | 177 | P49747        | 219 | P30273        |
| 136 | P29992        | 178 | P23467        | 220 | Q9NZP8        |
| 137 | P50148        | 179 | Q9UGM5        | 221 | P68366        |
| 138 | O95837        | 180 | P48059        | 222 | P13671        |
| 139 | P05067        | 181 | P47755        | 223 | Q96PD5        |
| 140 | P62873        | 182 | P52907        | 224 | P63000        |
| 141 | Q6YHK3        | 183 | P04278        | 225 | P07195        |
| 142 | Q9UK55        | 184 | P35613        | 226 | O15511        |
| 143 | P08637        | 185 | P04075        | 227 | O00560        |
| 144 | P60174        | 186 | A0A075B6K6    | 228 | P07358        |
| 145 | P15531        | 187 | P22352        | 229 | P19397        |
| 146 | P22392        | 188 | O00755        | 230 | Q9Y624        |
| 147 | P08572        | 189 | P56706        | 231 | Q99715        |
| 148 | P62491        | 190 | P0DP23        | 232 | Q8NBP7        |
| 149 | Q15907        | 191 | P0DP25        | 233 | P11277        |
| 150 | P27487        | 192 | P0DP24        | 234 | P15941        |
| 151 | Q15166        | 193 | Q08431        | 235 | Q76LX8        |
| 152 | P68104        | 194 | Q08495        | 236 | Q15942        |
| 153 | Q5VTE0        | 195 | Q16595        | 237 | Q9UM47        |
| 154 | Q05639        | 196 | P11233        | 238 | O00299        |
| 155 | Q86SQ4        | 197 | P11234        | 239 | P00746        |
| 156 | P39060        | 198 | P23528        | 240 | P14770        |
| 157 | P04792        | 199 | O95477        | 241 | Q4KWH8        |
| 158 | P60953        | 200 | P37802        | 242 | P00450        |

|     |               |     |               |     |               |
|-----|---------------|-----|---------------|-----|---------------|
| 159 | A0A075B6S4    | 201 | P04180        | 243 | P43652        |
| No. | Protein group | No. | Protein group | No. | Protein group |
| 244 | P01861        | 286 | P62937        | 328 | P15144        |
| 245 | A0A0C4DH30    | 287 | P06396        | 329 | P63104        |
| 246 | P23141        | 288 | P61769        | 330 | P05160        |
| 247 | O00602        | 289 | Q9BUN1        | 331 | P24043        |
| 248 | A2NJV5        | 290 | A0A087WSZ0    | 332 | Q7Z7G0        |
| 249 | Q6Q788        | 291 | P14543        | 333 | Q8NDA2        |
| 250 | P14618        | 292 | P02774        | 334 | P04439        |
| 251 | A0A0J9YVY3    | 293 | P62805        | 335 | P27105        |
| 252 | P13647        | 294 | Q9H4B7        | 336 | P08123        |
| 253 | Q14624        | 295 | Q06033        | 337 | P80748        |
| 254 | A0A087WW87    | 296 | P05546        | 338 | P02765        |
| 255 | P01614        | 297 | P11021        | 339 | P00747        |
| 256 | P59665        | 298 | Q86UX7        | 340 | P21333        |
| 257 | P59666        | 299 | Q15404        | 341 | Q13093        |
| 258 | P01764        | 300 | Q04756        | 342 | P04908        |
| 259 | Q92496        | 301 | Q6UX71        | 343 | Q9BTM1        |
| 260 | A0A2R8Y619    | 302 | O14672        | 344 | P0C0S8        |
| 261 | Q99880        | 303 | P0DP08        | 345 | Q99878        |
| 262 | Q99879        | 304 | P18206        | 346 | Q96KK5        |
| 263 | Q99877        | 305 | P29622        | 347 | Q93077        |
| 264 | Q96A08        | 306 | Q9P0K1        | 348 | Q7L7L0        |
| 265 | Q93079        | 307 | Q9HC84        | 349 | Q6FI13        |
| 266 | Q8N257        | 308 | A0A0B4J1V1    | 350 | Q16777        |
| 267 | Q5QNW6        | 309 | Q13418        | 351 | P20671        |
| 268 | Q16778        | 310 | A6NML5        | 352 | P01008        |
| 269 | P62807        | 311 | P10643        | 353 | Q9Y490        |
| 270 | P58876        | 312 | A0A0A0MS14    | 354 | P14151        |
| 271 | P57053        | 313 | P67936        | 355 | P62736        |
| 272 | P33778        | 314 | P18428        | 356 | P63267        |
| 273 | P23527        | 315 | Q9NQ79        | 357 | P00488        |
| 274 | P06899        | 316 | Q9ULI3        | 358 | P06276        |
| 275 | O60814        | 317 | P02786        | 359 | P02538        |
| 276 | A0A075B6I1    | 318 | P19827        | 360 | P48668        |
| 277 | P10321        | 319 | P00734        | 361 | P08697        |
| 278 | P05556        | 320 | P07357        | 362 | P04040        |
| 279 | P10646        | 321 | Q12907        | 363 | Q96RW7        |
| 280 | O95866        | 322 | A0A0C4DH42    | 364 | P11047        |
| 281 | P04899        | 323 | P01767        | 365 | P02743        |
| 282 | Q9UEW3        | 324 | P04217        | 366 | P01031        |
| 283 | A0A075B6K2    | 325 | P62328        | 367 | P07359        |
| 284 | P04406        | 326 | Q16880        | 368 | P68363        |

|     |               |     |               |     |               |
|-----|---------------|-----|---------------|-----|---------------|
| 285 | P11166        | 327 | Q9BXJ4        | 369 | P61224        |
| No. | Protein group | No. | Protein group | No. | Protein group |
| 370 | Q9HDC9        | 412 | P23229        | 454 | P78509        |
| 371 | P35555        | 413 | P35443        | 455 | P01593        |
| 372 | P68371        | 414 | P0DP09        | 456 | P01594        |
| 373 | P02730        | 415 | A0A0B4J2D9    | 457 | P01011        |
| 374 | P11142        | 416 | P02790        | 458 | P24821        |
| 375 | Q15582        | 417 | Q07954        | 459 | O95810        |
| 376 | P0DP01        | 418 | Q4LDE5        | 460 | Q9UHG3        |
| 377 | P02763        | 419 | Q8WWZ8        | 461 | A0A075B6R2    |
| 378 | P07737        | 420 | P02775        | 462 | P10720        |
| 379 | P01721        | 421 | P02452        | 463 | P07996        |
| 380 | P31946        | 422 | P32119        | 464 | A0A0B4J1V2    |
| 381 | A0A0C4DH31    | 423 | A0A075B6Q5    | 465 | Q8NI99        |
| 382 | P01743        | 424 | P13611        | 466 | Q9Y274        |
| 383 | P23471        | 425 | P35908        | 467 | A0A0A0MT89    |
| 384 | P48509        | 426 | P13645        | 468 | Q15485        |
| 385 | P15169        | 427 | A0A075B6K0    | 469 | A0A075B6K5    |
| 386 | P0DJI8        | 428 | P49908        | 470 | A0A0C4DH67    |
| 387 | P02776        | 429 | P02749        | 471 | A0A0C4DH36    |
| 388 | P16671        | 430 | Q13939        | 472 | P0DOX3        |
| 389 | P13224        | 431 | O00187        | 473 | P01042        |
| 390 | P02766        | 432 | A0A087WSX0    | 474 | A1L4H1        |
| 391 | P07942        | 433 | P02042        | 475 | P23083        |
| 392 | P20742        | 434 | Q6ZN30        | 476 | Q13790        |
| 393 | P26038        | 435 | A0A0C4DH24    | 477 | Q9Y6Z7        |
| 394 | P01718        | 436 | Q12912        | 478 | P01703        |
| 395 | P10124        | 437 | P22792        | 479 | A0A075B6H9    |
| 396 | P01817        | 438 | P55058        | 480 | P0C0L4        |
| 397 | O00592        | 439 | P09871        | 481 | P02760        |
| 398 | P16112        | 440 | A0A075B6S6    | 482 | A0A075B6K4    |
| 399 | Q6P2C8        | 441 | P01019        | 483 | P35527        |
| 400 | P19823        | 442 | A0A0C4DH29    | 484 | A0A087WSY4    |
| 401 | P02748        | 443 | A0A075B6H7    | 485 | Q92954        |
| 402 | P23142        | 444 | A0A0B4J1X8    | 486 | P01766        |
| 403 | A0A0C4DH32    | 445 | P21926        | 487 | Q9BWP8        |
| 404 | Q13201        | 446 | P01601        | 488 | P01833        |
| 405 | P05106        | 447 | A0A075B6S5    | 489 | P35858        |
| 406 | P0C0L5        | 448 | P12110        | 490 | P27918        |
| 407 | P80108        | 449 | A0A075B6P5    | 491 | P08514        |
| 408 | Q15848        | 450 | P01615        | 492 | P01597        |
| 409 | P05155        | 451 | P12109        | 493 | P04432        |
| 410 | P49913        | 452 | P04196        | 494 | Q9UMS6        |

|     |               |     |               |     |               |
|-----|---------------|-----|---------------|-----|---------------|
| 411 | P12111        | 453 | P02533        | 495 | P04004        |
| No. | Protein group | No. | Protein group | No. | Protein group |
| 496 | P02787        | 538 | A0A0C4DH68    | 580 | A0A075B6S2    |
| 497 | P01024        | 539 | P10909        | 581 | A0A0B4J1V6    |
| 498 | P01009        | 540 | A0A0C4DH35    | 582 | P02747        |
| 499 | P60709        | 541 | P00736        | 583 | O75636        |
| 500 | P0DTE1        | 542 | P06331        | 584 | P08519        |
| 501 | A0A0B4J1V0    | 543 | P01700        | 585 | P01624        |
| 502 | A0A075B6I9    | 544 | A0A0B4J1Y9    | 586 | P20851        |
| 503 | P08603        | 545 | A0A0C4DH43    | 587 | P0DOY3        |
| 504 | P01704        | 546 | P04275        | 588 | P01619        |
| 505 | P04430        | 547 | P01859        | 589 | P06312        |
| 506 | P01860        | 548 | P04211        | 590 | P01780        |
| 507 | P01714        | 549 | P69891        | 591 | P01877        |
| 508 | P0DP04        | 550 | O95445        | 592 | P02655        |
| 509 | P48740        | 551 | A0A0C4DH25    | 593 | P07225        |
| 510 | P06310        | 552 | P01701        | 594 | P01876        |
| 511 | Q9Y2Z0        | 553 | A0A087WSY6    | 595 | P02649        |
| 512 | A0A0J9YX35    | 554 | P05090        | 596 | P0DOX8        |
| 513 | P06727        | 555 | P03951        | 597 | P01591        |
| 514 | A0A0C4DH34    | 556 | P01709        | 598 | P02679        |
| 515 | A0A0J9YXX1    | 557 | P69905        | 599 | P04114        |
| 516 | P01705        | 558 | P35542        | 600 | P01023        |
| 517 | A0A0C4DH73    | 559 | A0A0C4DH55    | 601 | P15814        |
| 518 | P01611        | 560 | Q9Y6R7        | 602 | P00738        |
| 519 | A0A0A0MS15    | 561 | P55056        | 603 | O43866        |
| 520 | P01717        | 562 | P68871        | 604 | P02656        |
| 521 | P0DOX2        | 563 | A0A0B4J1U7    | 605 | P0DOX7        |
| 522 | A0A0G2JS06    | 564 | O14791        | 606 | P01834        |
| 523 | A0A0A0MT36    | 565 | P01742        | 607 | P02671        |
| 524 | P04264        | 566 | Q9P291        | 608 | P02675        |
| 525 | A0A075B6J9    | 567 | P02745        | 609 | P04003        |
| 526 | P01602        | 568 | A0A075B6I0    | 610 | P02647        |
| 527 | P01599        | 569 | P02654        | 611 | P01871        |
| 528 | P02751        | 570 | P02652        | 612 | P0DOX6        |
| 529 | P12259        | 571 | P0DOX5        | 613 | O00468        |
| 530 | A0A0C4DH38    | 572 | P02768        | 614 | Q92574        |
| 531 | P01706        | 573 | Q08380        | 615 | P00915        |
| 532 | P01699        | 574 | P04433        | 616 | P68431        |
| 533 | P11226        | 575 | P00739        | 617 | Q71DI3        |
| 534 | P19652        | 576 | P01768        | 618 | Q6NXT2        |
| 535 | A0A0B4J1Y8    | 577 | P0DP03        | 619 | Q5TEC6        |
| 536 | P27169        | 578 | P02746        | 620 | Q16695        |

|     |               |     |               |     |               |
|-----|---------------|-----|---------------|-----|---------------|
| 537 | A0A075B6R9    | 579 | A0A0B4J1X5    | 621 | P84243        |
| No. | Protein group | No. | Protein group | No. | Protein group |
| 622 | P09493        | 624 | PODTE2        |     |               |
| 623 | P01715        | 625 | P01593        |     |               |



Table S2 List of the identified proteins from exosomes of human plasma by using the SEC-UC method.

| No. | Protein group | No. | Protein group | No. | Protein group |
|-----|---------------|-----|---------------|-----|---------------|
| 1   | P0DOX6        | 40  | O14647        | 79  | P19652        |
| 2   | P01871        | 41  | P68871        | 80  | A0A0C4DH73    |
| 3   | P04114        | 42  | P15814        | 81  | P01611        |
| 4   | P0DOX7        | 43  | Q9Y6R7        | 82  | A0A0C4DH38    |
| 5   | P01023        | 44  | O75636        | 83  | P01704        |
| 6   | P01834        | 45  | P03951        | 84  | A0A075B6R9    |
| 7   | O43866        | 46  | O14791        | 85  | A0A0C4DH68    |
| 8   | P04003        | 47  | P02746        | 86  | P01599        |
| 9   | P00738        | 48  | Q9P291        | 87  | A0A075B6S5    |
| 10  | P01591        | 49  | A0A087WSY6    | 88  | A0A0C4DH35    |
| 11  | P02675        | 50  | P02747        | 89  | P01602        |
| 12  | P08519        | 51  | P06331        | 90  | P02751        |
| 13  | P02679        | 52  | Q08380        | 91  | P08514        |
| 14  | P0DOX8        | 53  | P55056        | 92  | A0A0A0MT36    |
| 15  | P02656        | 54  | P02652        | 93  | P35908        |
| 16  | P02647        | 55  | P04211        | 94  | P13645        |
| 17  | P0DOY3        | 56  | P01780        | 95  | P01706        |
| 18  | P02671        | 57  | P35542        | 96  | P60709        |
| 19  | P02649        | 58  | P02768        | 97  | P04430        |
| 20  | P01624        | 59  | O95445        | 98  | A0A0J9YX35    |
| 21  | P02655        | 60  | A0A0B4J1Y9    | 99  | P0DOX2        |
| 22  | P01619        | 61  | P04275        | 100 | P01699        |
| 23  | P06312        | 62  | A0A0C4DH43    | 101 | P00736        |
| 24  | P01772        | 63  | P0DOX5        | 102 | A0A0G2JS06    |
| 25  | P01876        | 64  | P01700        | 103 | P06310        |
| 26  | P01877        | 65  | P69905        | 104 | P10909        |
| 27  | P01782        | 66  | A0A075B6H7    | 105 | P27169        |
| 28  | A0A0B4J1X5    | 67  | P01709        | 106 | P01703        |
| 29  | A0A0B4J1V6    | 68  | P05090        | 107 | A0A0A0MS15    |
| 30  | A0A075B6S2    | 69  | P02654        | 108 | A0A0B4J1V0    |
| 31  | P04433        | 70  | P01701        | 109 | P01766        |
| 32  | A0A075B6I0    | 71  | P20851        | 110 | P01705        |
| 33  | P00739        | 72  | A0A0B4J1Y8    | 111 | A0A075B6R2    |
| 34  | P07225        | 73  | A0A0C4DH25    | 112 | P01833        |
| 35  | O14646        | 74  | A0A0B4J1U7    | 113 | P01717        |
| 36  | Q9P2D1        | 75  | P02745        | 114 | P0DOX3        |
| 37  | Q9HCK8        | 76  | P04264        | 115 | P12259        |
| 38  | Q8TD26        | 77  | P01859        | 116 | P35527        |
| 39  | Q3L8U1        | 78  | P01764        | 117 | P12109        |

| No. | Protein group | No. | Protein group | No. | Protein group |
|-----|---------------|-----|---------------|-----|---------------|
| 118 | A0A075B6K4    | 160 | Q9UHG3        | 202 | P11166        |
| 119 | P48740        | 161 | P02730        | 203 | O00592        |
| 120 | P01597        | 162 | P23083        | 204 | A0A0J9YXX1    |
| 121 | P04432        | 163 | P01019        | 205 | P02787        |
| 122 | A0A0C4DH34    | 164 | P06727        | 206 | P02748        |
| 123 | O95810        | 165 | Q9BWP8        | 207 | P63104        |
| 124 | A0A0A0MT89    | 166 | Q8N1N4        | 208 | P0DP01        |
| 125 | A0A075B6K5    | 167 | P01860        | 209 | A0A0C4DH55    |
| 126 | P11226        | 168 | A1L4H1        | 210 | P21926        |
| 127 | P02533        | 169 | A0A0B4J1V1    | 211 | P02042        |
| 128 | P78509        | 170 | P48509        | 212 | A0A0B4J2D9    |
| 129 | Q07283        | 171 | P07996        | 213 | P0DP09        |
| 130 | A0A087WSZ0    | 172 | A0A0C4DH67    | 214 | P01743        |
| 131 | A0A075B6H9    | 173 | P24821        | 215 | P59665        |
| 132 | Q9Y274        | 174 | A0A075B6I4    | 216 | P59666        |
| 133 | Q9Y490        | 175 | P13224        | 217 | P04439        |
| 134 | P01024        | 176 | Q8NI99        | 218 | P20742        |
| 135 | P01593        | 177 | A0A075B6Q5    | 219 | P18428        |
| 136 | P01594        | 178 | P01011        | 220 | Q86UX7        |
| 137 | P12110        | 179 | P56182        | 221 | P49913        |
| 138 | A0A087WSX0    | 180 | P01767        | 222 | P68363        |
| 139 | A0A075B6S9    | 181 | A0A075B6I9    | 223 | P63000        |
| 140 | P0DSN7        | 182 | P23229        | 224 | P14770        |
| 141 | P0C0L4        | 183 | O00187        | 225 | P01031        |
| 142 | A0A0C4DH36    | 184 | Q4LDE5        | 226 | P14151        |
| 143 | Q9Y6Z7        | 185 | A0A0C4DH24    | 227 | A0A0B4J1V2    |
| 144 | P01601        | 186 | A0A087WSY4    | 228 | P21333        |
| 145 | A0A075B6J9    | 187 | P16671        | 229 | O14672        |
| 146 | A0A075B6P5    | 188 | A0A0B4J1X8    | 230 | P02760        |
| 147 | P01615        | 189 | P02776        | 231 | Q9Y624        |
| 148 | P01742        | 190 | P13647        | 232 | P04899        |
| 149 | P04004        | 191 | A0A0C4DH29    | 233 | P01715        |
| 150 | P61224        | 192 | P15144        | 234 | Q8WWZ8        |
| 151 | P0DTE1        | 193 | Q13790        | 235 | P49908        |
| 152 | P01042        | 194 | P07359        | 236 | P0DJI8        |
| 153 | P01714        | 195 | P01817        | 237 | P05155        |
| 154 | P01009        | 196 | P60033        | 238 | P02786        |
| 155 | P05106        | 197 | P26038        | 239 | P22792        |
| 156 | P02538        | 198 | P04259        | 240 | Q9ULI3        |
| 157 | P04196        | 199 | P12111        | 241 | A0A075B6S4    |
| 158 | Q13201        | 200 | Q15485        | 242 | P35443        |
| 159 | P08603        | 201 | A0A0C4DH31    | 243 | Q13093        |

| No. | Protein group | No. | Protein group | No. | Protein group |
|-----|---------------|-----|---------------|-----|---------------|
| 244 | Q9H4B7        | 286 | P01762        | 328 | Q9BTM1        |
| 245 | Q07954        | 287 | P02765        | 329 | Q99878        |
| 246 | P0DP08        | 288 | P19827        | 330 | Q96KK5        |
| 247 | P01718        | 289 | P02743        | 331 | Q93077        |
| 248 | P07737        | 290 | P00488        | 332 | Q7L7L0        |
| 249 | A2NJV5        | 291 | Q13418        | 333 | Q6FI13        |
| 250 | P02766        | 292 | A0M8Q6        | 334 | Q16777        |
| 251 | P10646        | 293 | P11142        | 335 | P20671        |
| 252 | P19397        | 294 | A0A075B6K2    | 336 | P0C0S8        |
| 253 | A0A075B6K0    | 295 | P07358        | 337 | P61586        |
| 254 | P00747        | 296 | Q01518        | 338 | P11277        |
| 255 | Q15404        | 297 | P06396        | 339 | P01768        |
| 256 | P02749        | 298 | P16112        | 340 | P0DP03        |
| 257 | P19823        | 299 | Q9HBI1        | 341 | P07947        |
| 258 | P05556        | 300 | P05546        | 342 | Q15942        |
| 259 | A0A075B6I1    | 301 | P01721        | 343 | P14618        |
| 260 | P27918        | 302 | P27105        | 344 | P48059        |
| 261 | P18206        | 303 | Q96RW7        | 345 | P40197        |
| 262 | A0A0A0MS14    | 304 | A0A075B6I7    | 346 | P00338        |
| 263 | A8MYU2        | 305 | P08697        | 347 | P35858        |
| 264 | Q92954        | 306 | P01861        | 348 | P23142        |
| 265 | P30273        | 307 | A0A0C4DH32    | 349 | Q8NDA2        |
| 266 | P68371        | 308 | P01008        | 350 | Q8WWI5        |
| 267 | P07942        | 309 | P09871        | 351 | Q08431        |
| 268 | Q9H6L2        | 310 | Q15848        | 352 | P04217        |
| 269 | P80748        | 311 | P62805        | 353 | O75083        |
| 270 | P62879        | 312 | P10643        | 354 | P15169        |
| 271 | Q08722        | 313 | Q6Q788        | 355 | P11169        |
| 272 | Q8TC71        | 314 | P07195        | 356 | Q8TDB8        |
| 273 | O15511        | 315 | P35613        | 357 | P15531        |
| 274 | P16157        | 316 | P16452        | 358 | P22392        |
| 275 | A0A075B6S6    | 317 | Q9HC84        | 359 | P62987        |
| 276 | P80108        | 318 | P15153        | 360 | P62979        |
| 277 | A0A0J9YVY3    | 319 | P23467        | 361 | P0CG48        |
| 278 | Q9BW61        | 320 | Q9HDC9        | 362 | P0CG47        |
| 279 | P13987        | 321 | Q14624        | 363 | O00299        |
| 280 | P0C0L5        | 322 | P02549        | 364 | P02775        |
| 281 | O95866        | 323 | Q9BUN1        | 365 | P62937        |
| 282 | P04406        | 324 | P01763        | 366 | P68104        |
| 283 | P06276        | 325 | Q96PD5        | 367 | P68366        |
| 284 | P13671        | 326 | Q8N699        | 368 | Q14697        |
| 285 | P32119        | 327 | P04908        | 369 | A0A0C4DH30    |

| No. | Protein group | No. | Protein group | No. | Protein group |
|-----|---------------|-----|---------------|-----|---------------|
| 370 | P37802        | 412 | A0A075B6J1    | 454 | Q9UKE5        |
| 371 | Q04756        | 413 | P62328        | 455 | Q8N4C8        |
| 372 | Q8IYT4        | 414 | P08637        | 456 | P00734        |
| 373 | P14543        | 415 | Q9H4M9        | 457 | P01889        |
| 374 | P67936        | 416 | Q76LX8        | 458 | Q9ULV4        |
| 375 | Q06033        | 417 | P06733        | 459 | P04180        |
| 376 | O00560        | 418 | Q86YZ3        | 460 | O15145        |
| 377 | P29622        | 419 | O75954        | 461 | P13716        |
| 378 | P53801        | 420 | Q9Y6C2        | 462 | P00450        |
| 379 | Q04695        | 421 | Q15833        | 463 | A0A087WW87    |
| 380 | P07437        | 422 | Q86UF1        | 464 | P01614        |
| 381 | P13611        | 423 | Q14623        | 465 | P15924        |
| 382 | Q15582        | 424 | P51149        | 466 | Q00610        |
| 383 | Q06830        | 425 | Q13103        | 467 | O00429        |
| 384 | P24043        | 426 | Q6UX71        | 468 | Q9BYJ0        |
| 385 | P17301        | 427 | P61769        | 469 | P61026        |
| 386 | P61225        | 428 | P50993        | 470 | Q00013        |
| 387 | P02790        | 429 | P23528        | 471 | P11233        |
| 388 | Q99715        | 430 | Q5T749        | 472 | P11234        |
| 389 | P02763        | 431 | O14950        | 473 | P35579        |
| 390 | P16070        | 432 | P19105        | 474 | Q9UJY5        |
| 391 | P04075        | 433 | P61204        | 475 | P50552        |
| 392 | P11047        | 434 | P84077        | 476 | P55103        |
| 393 | Q13287        | 435 | P62491        | 477 | P61006        |
| 394 | Q7L576        | 436 | Q15907        | 478 | P01814        |
| 395 | Q8WW52        | 437 | Q92496        | 479 | P19086        |
| 396 | O00602        | 438 | P11597        | 480 | A0A0C4DH33    |
| 397 | P24844        | 439 | P68032        | 481 | Q08495        |
| 398 | P62873        | 440 | P68133        | 482 | Q6UWP8        |
| 399 | P08575        | 441 | P07900        | 483 | P61981        |
| 400 | P10321        | 442 | P0DTE2        | 484 | P31146        |
| 401 | P12931        | 443 | P20340        | 485 | P0DPH7        |
| 402 | P07357        | 444 | Q9NRW1        | 486 | P0DPH8        |
| 403 | A0A0C4DH41    | 445 | A0A075B6K6    | 487 | P60174        |
| 404 | P01825        | 446 | P20701        | 488 | Q9UM47        |
| 405 | Q8NBI5        | 447 | P62826        | 489 | Q16568        |
| 406 | P00746        | 448 | Q7Z7G0        | 490 | Q15166        |
| 407 | P50148        | 449 | Q96RT1        | 491 | P35555        |
| 408 | P02774        | 450 | Q14344        | 492 | P23141        |
| 409 | Q9H0U4        | 451 | P63261        | 493 | Q9NP79        |
| 410 | P58335        | 452 | P03952        | 494 | Q9NZP8        |
| 411 | P52566        | 453 | O95819        | 495 | P78417        |

| No. | Protein group | No. | Protein group | No. | Protein group |
|-----|---------------|-----|---------------|-----|---------------|
| 496 | P31150        | 538 | P22748        | 580 | Q9H6X2        |
| 497 | P50395        | 539 | P14625        | 581 | P14923        |
| 498 | P16284        | 540 | Q86SQ4        | 582 | O75955        |
| 499 | Q9HCN6        | 541 | P49746        | 583 | O00161        |
| 500 | P84095        | 542 | P49747        | 584 | Q01433        |
| 501 | Q15762        | 543 | Q9UK55        | 585 | Q8IZP0        |
| 502 | P05023        | 544 | P11171        | 586 | P02452        |
| 503 | Q96KN2        | 545 | Q9BXJ4        | 587 | P60660        |
| 504 | Q14766        | 546 | P62258        | 588 | P13639        |
| 505 | B2RUZ4        | 547 | P22694        | 589 | O60814        |
| 506 | Q8NBS9        | 548 | P08571        | 590 | Q99880        |
| 507 | P01137        | 549 | P04040        | 591 | Q99879        |
| 508 | P30101        | 550 | Q5SQ64        | 592 | Q99877        |
| 509 | P07203        | 551 | P08238        | 593 | Q93079        |
| 510 | P59998        | 552 | P01911        | 594 | Q5QNW6        |
| 511 | P60953        | 553 | P79483        | 595 | Q16778        |
| 512 | P07237        | 554 | P04278        | 596 | P62807        |
| 513 | P09651        | 555 | Q9UL25        | 597 | P58876        |
| 514 | O00194        | 556 | P47756        | 598 | P57053        |
| 515 | P04792        | 557 | Q9H4G4        | 599 | P33778        |
| 516 | P07355        | 558 | P08195        | 600 | P23527        |
| 517 | P06702        | 559 | Q6YHK3        | 601 | P06899        |
| 518 | P00558        | 560 | A0A0A0MRZ9    | 602 | P12814        |
| 519 | P07384        | 561 | Q02094        | 603 | P05154        |
| 520 | P55058        | 562 | Q9NZN3        | 604 | P25787        |
| 521 | Q9Y315        | 563 | P69891        | 605 | P10809        |
| 522 | O15400        | 564 | P05543        | 606 | P05362        |
| 523 | P00451        | 565 | O15143        | 607 | P15941        |
| 524 | Q14644        | 566 | P05160        | 608 | P55209        |
| 525 | P10644        | 567 | P09211        | 609 | Q99685        |
| 526 | P07360        | 568 | P11021        | 610 | O15264        |
| 527 | Q8WXI7        | 569 | Q92686        | 611 | Q16539        |
| 528 | Q8N386        | 570 | O75558        | 612 | Q15759        |
| 529 | P0DMV8        | 571 | Q9NY65        | 613 | P53779        |
| 530 | P0DMV9        | 572 | Q02413        | 614 | P53778        |
| 531 | Q8WUJ3        | 573 | Q15365        | 615 | P45984        |
| 532 | P35030        | 574 | Q9H299        | 616 | P45983        |
| 533 | P39060        | 575 | P52907        | 617 | Q9UKY3        |
| 534 | P30041        | 576 | P30622        | 618 | Q8NBP7        |
| 535 | Q9UBW5        | 577 | Q14392        | 619 | P63241        |
| 536 | Q9BZK7        | 578 | P19971        | 620 | Q9GZV4        |
| 537 | Q8NG11        | 579 | P55072        | 621 | Q6IS14        |

| No. | Protein group | No. | Protein group | No. | Protein group |
|-----|---------------|-----|---------------|-----|---------------|
| 622 | Q13361        | 664 | Q15555        | 706 | P08754        |
| 623 | Q15063        | 665 | P62081        | 707 | P62841        |
| 624 | P19338        | 666 | Q8WUW1        | 708 | P29401        |
| 625 | P02724        | 667 | Q92882        | 709 | P08670        |
| 626 | P98160        | 668 | P17927        | 710 | P49321        |
| 627 | P26641        | 669 | P22314        | 711 | P18621        |
| 628 | O15144        | 670 | P43652        | 712 | O00410        |
| 629 | P11413        | 671 | P13010        | 713 | O95477        |
| 630 | P27797        | 672 | P61158        | 714 | P01597;P04432 |
| 631 | P22626        | 673 | Q8WXU2        | 715 | P40227        |
| 632 | P31943        | 674 | Q9NVC6        | 716 | P06454        |
| 633 | P09326        | 675 | Q9NPY3        | 717 | Q9Y277        |
| 634 | P0CF97        | 676 | Q01469        | 718 | Q15019        |
| 635 | Q5D862        | 677 | Q12907        | 719 | P21796        |
| 636 | Q16401        | 678 | P61247        | 720 | P62266        |
| 637 | Q9BQE3        | 679 | P38646        | 721 | O43175        |
| 638 | Q9UEW3        | 680 | Q9H9E3        | 722 | Q14974        |
| 639 | P06748        | 681 | Q04917        | 723 | Q99714        |
| 640 | P18669        | 682 | P27487        | 724 | P32969        |
| 641 | A0A0C4DH39    | 683 | P16109        | 725 | P35520        |
| 642 | Q58FF8        | 684 | P37837        | 726 | P06576        |
| 643 | P08567        | 685 | P49327        | 727 | P49588        |
| 644 | O43294        | 686 | P18754        | 728 | P31948        |
| 645 | P60842        | 687 | Q00839        | 729 | P15170        |
| 646 | Q9Y251        | 688 | O15117        | 730 | Q9P258        |
| 647 | P58166        | 689 | Q08211        | 731 | P31930        |
| 648 | Q02817        | 690 | P22087        | 732 | P15880        |
| 649 | P11586        | 691 | P59768        | 733 | Q5T2N8        |
| 650 | Q13200        | 692 | Q86YW5        | 734 | Q5T9A4        |
| 651 | Q9Y6Y9        | 693 | Q9HAV0        | 735 | Q9NV17        |
| 652 | Q9P126        | 694 | A0A0B4J2H0    | 736 | O95777        |
| 653 | P08779        | 695 | P61978        | 737 | P12956        |
| 654 | Q16181        | 696 | Q9HCM2        | 738 | Q99439        |
| 655 | P78371        | 697 | O60610        | 739 | P11908        |
| 656 | Q14254        | 698 | P62318        | 740 | P60891        |
| 657 | P26599        | 699 | P48643        | 741 | P49720        |
| 658 | Q12913        | 700 | Q9UQ80        | 742 | O95782        |
| 659 | Q9P0L0        | 701 | P09493        | 743 | P25705        |
| 660 | B0I1T2        | 702 | P00492        | 744 | P46782        |
| 661 | P06681        | 703 | P12236        | 745 | Q8IWA5        |
| 662 | P12277        | 704 | P61313        | 746 | Q5T4S7        |
| 663 | P47755        | 705 | P46783        | 747 | Q8TC12        |

| No. | Protein group | No. | Protein group | No. | Protein group |
|-----|---------------|-----|---------------|-----|---------------|
| 748 | Q15181        | 754 | Q5R372        | 760 | P60981        |
| 749 | P18085        | 755 | P07910        | 761 | P61604        |
| 750 | P35232        | 756 | P08243        | 762 | P63244        |
| 751 | P55060        | 757 | P09874        | 763 | Q12905        |
| 752 | P62899        | 758 | P50990        | 764 | Q15366        |
| 753 | P31942        | 759 | P52272        |     |               |

Table S3 List of the identified proteins from exosomes of human plasma by using the SEC-UF method.

| No. | Protein group | No. | Protein group | No. | Protein group |
|-----|---------------|-----|---------------|-----|---------------|
| 1   | P0DOX6        | 40  | O14791        | 79  | A0A0C4DH67    |
| 2   | P01871        | 41  | P04264        | 80  | P19652        |
| 3   | P02675        | 42  | P68871        | 81  | P01599        |
| 4   | P01834        | 43  | O75636        | 82  | P00736        |
| 5   | P01023        | 44  | P01860        | 83  | A0A0C4DH35    |
| 6   | P04003        | 45  | P0DOX5        | 84  | A0A075B6R9    |
| 7   | P04114        | 46  | P20851        | 85  | A0A0C4DH68    |
| 8   | P0DOX7        | 47  | Q9P291        | 86  | P02751        |
| 9   | P02679        | 48  | P02745        | 87  | P02533        |
| 10  | P01591        | 49  | P02652        | 88  | A0A0C4DH38    |
| 11  | P00738        | 50  | A0A087WSY6    | 89  | A0A0A0MT36    |
| 12  | O43866        | 51  | A0A075B6H7    | 90  | A0A0C4DH73    |
| 13  | P02647        | 52  | P06331        | 91  | P01611        |
| 14  | P02671        | 53  | A0A0B4J1Y9    | 92  | P01699        |
| 15  | P07225        | 54  | P01780        | 93  | A0A0J9YX35    |
| 16  | P0DOY3        | 55  | A0A0B4J1U7    | 94  | P10909        |
| 17  | P0DOX8        | 56  | Q08380        | 95  | P01602        |
| 18  | P01876        | 57  | P69905        | 96  | P01703        |
| 19  | P02649        | 58  | P04211        | 97  | P23083        |
| 20  | P0DOX2        | 59  | P35908        | 98  | P11226        |
| 21  | P01619        | 60  | P08519        | 99  | P04430        |
| 22  | P01624        | 61  | P55056        | 100 | Q9Y274        |
| 23  | P02746        | 62  | P02654        | 101 | P04259        |
| 24  | P06312        | 63  | P01700        | 102 | P27169        |
| 25  | P01762        | 64  | P05090        | 103 | A0A0G2JS06    |
| 26  | P02656        | 65  | Q8N1N4        | 104 | A0A0A0MS15    |
| 27  | P01768        | 66  | O95445        | 105 | P01024        |
| 28  | P0DP03        | 67  | P15814        | 106 | Q9Y2Z0        |
| 29  | P02747        | 68  | P13645        | 107 | A0A0B4J1V0    |
| 30  | P02768        | 69  | A0A0C4DH25    | 108 | A0A0A0MT89    |
| 31  | P01742        | 70  | P01701        | 109 | P02538        |
| 32  | A0A075B6I0    | 71  | A0A0B4J1Y8    | 110 | P48740        |
| 33  | P04433        | 72  | A0A0C4DH43    | 111 | A0A0C4DH55    |
| 34  | P02655        | 73  | P01709        | 112 | P01597        |
| 35  | A0A075B6S2    | 74  | P04275        | 113 | P04432        |
| 36  | Q9Y6R7        | 75  | P35527        | 114 | P01706        |
| 37  | P00739        | 76  | P01704        | 115 | P06310        |
| 38  | A0A0B4J1X5    | 77  | P01859        | 116 | P08603        |
| 39  | A0A0B4J1V6    | 78  | P35542        | 117 | A0A0J9YXX1    |



| No. | Protein group | No. | Protein group | No. | Protein group |
|-----|---------------|-----|---------------|-----|---------------|
| 118 | A0A075B6K5    | 160 | P04196        | 202 | P07359        |
| 119 | P01833        | 161 | P22792        | 203 | P01817        |
| 120 | P0DOX3        | 162 | A0A0B4J1V1    | 204 | P04908        |
| 121 | P01766        | 163 | Q96RW7        | 205 | Q9BTM1        |
| 122 | P60709        | 164 | P01011        | 206 | Q99878        |
| 123 | P63261        | 165 | A0A075B6Q5    | 207 | Q96KK5        |
| 124 | P01705        | 166 | P02760        | 208 | Q93077        |
| 125 | A0A075B6J9    | 167 | A0A075B6P5    | 209 | Q7L7L0        |
| 126 | A0A075B6I9    | 168 | P01615        | 210 | Q6FI13        |
| 127 | A1L4H1        | 169 | P01019        | 211 | Q16777        |
| 128 | P01717        | 170 | Q15485        | 212 | P20671        |
| 129 | A0A0C4DH36    | 171 | P07996        | 213 | P0C0S8        |
| 130 | P12259        | 172 | P12111        | 214 | O00592        |
| 131 | P55058        | 173 | A0A087WSY4    | 215 | P15169        |
| 132 | A0A087WSX0    | 174 | O00187        | 216 | A0A0A0MS14    |
| 133 | P01009        | 175 | P07942        | 217 | P80108        |
| 134 | A0A075B6R2    | 176 | P56182        | 218 | A0A087WSZ0    |
| 135 | P27918        | 177 | Q92954        | 219 | P59665        |
| 136 | P06727        | 178 | A0A075B6S5    | 220 | P59666        |
| 137 | A0A0C4DH34    | 179 | P19823        | 221 | Q5T749        |
| 138 | P0C0L4        | 180 | A0A0C4DH24    | 222 | P49908        |
| 139 | P01714        | 181 | Q9BWP8        | 223 | A0A075B6S4    |
| 140 | A0A075B6H9    | 182 | A0A0C4DH31    | 224 | P23229        |
| 141 | P02787        | 183 | P09871        | 225 | P16112        |
| 142 | P12109        | 184 | P01593        | 226 | P19827        |
| 143 | A0A075B6K4    | 185 | P01594        | 227 | P21926        |
| 144 | P01042        | 186 | P49913        | 228 | P11047        |
| 145 | P78509        | 187 | A0A0C4DH29    | 229 | P24043        |
| 146 | P24821        | 188 | P02748        | 230 | Q07954        |
| 147 | P01601        | 189 | Q13790        | 231 | O95954        |
| 148 | P08514        | 190 | A0M8Q6        | 232 | A0A075B6I4    |
| 149 | Q9UHG3        | 191 | P35443        | 233 | P15144        |
| 150 | Q9Y6Z7        | 192 | Q2VY69        | 234 | P39060        |
| 151 | P04004        | 193 | A0A0B4J2D9    | 235 | P13647        |
| 152 | P0DP04        | 194 | P0DP09        | 236 | Q8NDA2        |
| 153 | P20742        | 195 | A0A075B6K0    | 237 | P03951        |
| 154 | Q9UMS6        | 196 | P01764        | 238 | Q13201        |
| 155 | P0DTE1        | 197 | P02042        | 239 | P48509        |
| 156 | P12110        | 198 | P35555        | 240 | P15924        |
| 157 | A0A075B6S9    | 199 | P05155        | 241 | P00747        |
| 158 | P0DSN7        | 200 | P01718        | 242 | A0A075B6S6    |
| 159 | Q4LDE5        | 201 | P14151        | 243 | Q7Z7G0        |

| No. | Protein group | No. | Protein group | No. | Protein group |
|-----|---------------|-----|---------------|-----|---------------|
| 244 | P02765        | 286 | P05106        | 328 | P05160        |
| 245 | P14543        | 287 | P05089        | 329 | P02743        |
| 246 | Q6UX71        | 288 | P15941        | 330 | P02763        |
| 247 | Q8NI99        | 289 | Q99996        | 331 | Q92496        |
| 248 | P02749        | 290 | Q15582        | 332 | P62805        |
| 249 | Q9ULI3        | 291 | P05546        | 333 | Q99715        |
| 250 | P0DP01        | 292 | P02730        | 334 | P98161        |
| 251 | O95810        | 293 | P29622        | 335 | P13716        |
| 252 | Q8WWZ8        | 294 | Q06033        | 336 | P68363        |
| 253 | P02452        | 295 | Q16880        | 337 | Q9Y624        |
| 254 | P01767        | 296 | P07358        | 338 | P49747        |
| 255 | P01715        | 297 | P02766        | 339 | P61224        |
| 256 | P06276        | 298 | Q3SY84        | 340 | P05556        |
| 257 | Q13093        | 299 | A0A075B6I1    | 341 | Q6P2C8        |
| 258 | P32119        | 300 | P10646        | 342 | Q8TC71        |
| 259 | P01031        | 301 | Q9UM47        | 343 | Q04756        |
| 260 | P08697        | 302 | P02790        | 344 | P06396        |
| 261 | P26038        | 303 | P60033        | 345 | P02774        |
| 262 | Q06830        | 304 | Q86YZ3        | 346 | P00451        |
| 263 | P00488        | 305 | P04439        | 347 | P04217        |
| 264 | P02776        | 306 | Q9H4B7        | 348 | A0A0B4J1V2    |
| 265 | Q15848        | 307 | P0DP08        | 349 | Q01518        |
| 266 | P01008        | 308 | P13671        | 350 | P00734        |
| 267 | A0A0B4J1X8    | 309 | P01721        | 351 | P17031        |
| 268 | A0A0C4DH32    | 310 | P10643        | 352 | A0JNW5        |
| 269 | Q9HDC9        | 311 | Q96PD5        | 353 | P21333        |
| 270 | A8MTJ3        | 312 | P23142        | 354 | O95866        |
| 271 | Q5JWF2        | 313 | A0A0J9YVY3    | 355 | Q8WWI5        |
| 272 | P63096        | 314 | Q14624        | 356 | P00746        |
| 273 | P63092        | 315 | Q8NBP7        | 357 | P16150        |
| 274 | P38405        | 316 | P14923        | 358 | P05543        |
| 275 | P19087        | 317 | P0C0L5        | 359 | P00748        |
| 276 | P11488        | 318 | P63104        | 360 | Q9Y490        |
| 277 | P09471        | 319 | P0DJI8        | 361 | Q14697        |
| 278 | P08754        | 320 | P16671        | 362 | P43652        |
| 279 | P04899        | 321 | Q9HC84        | 363 | Q76LX8        |
| 280 | Q9BV35        | 322 | A2NJV5        | 364 | Q15517        |
| 281 | P18428        | 323 | P80748        | 365 | Q86UX7        |
| 282 | P08123        | 324 | A0A075B6I7    | 366 | P13987        |
| 283 | P01743        | 325 | Q5T750        | 367 | P13224        |
| 284 | P35858        | 326 | P07437        | 368 | P04278        |
| 285 | P13611        | 327 | P68371        | 369 | Q9UEW3        |

| No. | Protein group | No. | Protein group | No. | Protein group |
|-----|---------------|-----|---------------|-----|---------------|
| 370 | P35579        | 412 | O00560        | 454 | Q14623        |
| 371 | P04180        | 413 | P07357        | 455 | Q9HBI1        |
| 372 | P11021        | 414 | P00338        | 456 | Q14766        |
| 373 | P41222        | 415 | Q6ZMR3        | 457 | A0A075B6K2    |
| 374 | P23467        | 416 | P07864        | 458 | P06748        |
| 375 | Q9NZP8        | 417 | P07195        | 459 | P78417        |
| 376 | P07360        | 418 | P23490        | 460 | Q9Y6Y9        |
| 377 | P03952        | 419 | Q96P63        | 461 | Q8WXI7        |
| 378 | P02786        | 420 | P11597        | 462 | P69891        |
| 379 | A0A087WW87    | 421 | P07737        | 463 | P08311        |
| 380 | P01614        | 422 | P08779        | 464 | Q86UF1        |
| 381 | P18206        | 423 | Q08554        | 465 | O75223        |
| 382 | Q8IZJ3        | 424 | P01772        | 466 | O00602        |
| 383 | P10321        | 425 | O14672        | 467 | P22735        |
| 384 | P30101        | 426 | Q8WUJ3        | 468 | P68366        |
| 385 | P11142        | 427 | P08572        | 469 | P22531        |
| 386 | P07237        | 428 | Q9BYJ0        | 470 | P11279        |
| 387 | P16070        | 429 | Q15063        | 471 | P05154        |
| 388 | P06753        | 430 | P10599        | 472 | P12273        |
| 389 | P67936        | 431 | P25311        | 473 | P16452        |
| 390 | P09493        | 432 | Q13103        | 474 | P06702        |
| 391 | P07951        | 433 | Q13835        | 475 | P35247        |
| 392 | P22105        | 434 | P17301        | 476 | P08571        |
| 393 | P01861        | 435 | P04792        | 477 | P14770        |
| 394 | P0CG47        | 436 | P55103        | 478 | P11277        |
| 395 | P0CG48        | 437 | P55268        | 479 | Q15942        |
| 396 | P62979        | 438 | P61626        | 480 | P35754        |
| 397 | P62987        | 439 | Q9BUN1        | 481 | P98160        |
| 398 | Q9BXJ4        | 440 | P00751        | 482 | Q5D862        |
| 399 | P11166        | 441 | P19013        | 483 | O95837        |
| 400 | P62873        | 442 | Q9NSC7        | 484 | P29992        |
| 401 | P62879        | 443 | Q08188        | 485 | P50148        |
| 402 | Q9HAV0        | 444 | P11169        | 486 | P16157        |
| 403 | P04406        | 445 | Q8TDB8        | 487 | P13646        |
| 404 | P05067        | 446 | P68104        | 488 | Q04695        |
| 405 | P00450        | 447 | Q05639        | 489 | P07339        |
| 406 | Q9UBW5        | 448 | Q5VTE0        | 490 | P02462        |
| 407 | P02549        | 449 | P00558        | 491 | Q6UWP8        |
| 408 | Q02413        | 450 | Q01469        | 492 | P50395        |
| 409 | P23141        | 451 | P31025        | 493 | Q86SQ4        |
| 410 | A0A0C4DH30    | 452 | A0A075B6K6    | 494 | P09211        |
| 411 | P04040        | 453 | Q00610        | 495 | O75339        |

| No. | Protein group | No. | Protein group | No. | Protein group |
|-----|---------------|-----|---------------|-----|---------------|
| 496 | P61204        | 533 | P49721        | 570 | Q13287        |
| 497 | P84077        | 534 | P55072        | 571 | Q9UJY5        |
| 498 | P08709        | 535 | P22528        | 572 | P23528        |
| 499 | P13639        | 536 | P35321        | 573 | P26599        |
| 500 | Q8NBS9        | 537 | P07355        | 574 | Q9UBQ6        |
| 501 | P84095        | 538 | Q6KB66        | 575 | Q4FZB7        |
| 502 | P49746        | 539 | P62258        | 576 | O43707        |
| 503 | Q9NQ79        | 540 | P31944        | 577 | P12814        |
| 504 | P15153        | 541 | Q9UQP3        | 578 | P62736        |
| 505 | Q9UHD2        | 542 | Q96FQ6        | 579 | P63267        |
| 506 | Q6ZVX7        | 543 | O75342        | 580 | O43790        |
| 507 | P26022        | 544 | P61247        | 581 | Q14533        |
| 508 | P60174        | 545 | Q8WVV4        | 582 | O76009        |
| 509 | P35030        | 546 | Q14515        | 583 | P29508        |
| 510 | Q9UK55        | 547 | P25788        | 584 | Q14574        |
| 511 | O43548        | 548 | O75131        | 585 | P78386        |
| 512 | P60953        | 549 | P53350        | 586 | Q9GZZ8        |
| 513 | P06733        | 550 | Q16378        | 587 | P42357        |
| 514 | Q13867        | 551 | P62826        | 588 | P02788        |
| 515 | P19338        | 552 | P27105        | 589 | Q9UBC9        |
| 516 | A0A0A0MRZ9    | 553 | P25787        | 590 | O75556        |
| 517 | Q16401        | 554 | Q16610        | 591 | P40394        |
| 518 | Q7L576        | 555 | O60814        | 592 | Q9HCY8        |
| 519 | Q96F07        | 556 | Q99880        | 593 | Q14525        |
| 520 | P21589        | 557 | Q99879        | 594 | Q9C075        |
| 521 | P62937        | 558 | Q99877        | 595 | Q9UBX7        |
| 522 | Q13361        | 559 | Q93079        | 596 | Q52LG2        |
| 523 | Q9NZT1        | 560 | Q8N257        | 597 | O75874        |
| 524 | P49189        | 561 | Q5QNW6        | 598 | P0DPA2        |
| 525 | P00491        | 562 | Q16778        | 599 | Q8IUC0        |
| 526 | P12081        | 563 | P62807        | 600 | P60900        |
| 527 | P62081        | 564 | P58876        | 601 | P31947        |
| 528 | P20930        | 565 | P57053        | 602 | Q9HD45        |
| 529 | P81605        | 566 | P33778        | 603 | P07814        |
| 530 | P04083        | 567 | P23527        | 604 | P29401        |
| 531 | Q02817        | 568 | P06899        | 605 | P47929        |
| 532 | Q9UBG3        | 569 | Q8NF91        | 606 | Q8IUC1        |

Table S4 List of the identified proteins from exosomes of human plasma by using the SEC-TiO<sub>2</sub> method.

| No. | Protein group | No. | Protein group | No. | Protein group |
|-----|---------------|-----|---------------|-----|---------------|
| 1   | P04264        | 40  | P06732        | 79  | P09525        |
| 2   | P04275        | 41  | P06733        | 80  | P09871        |
| 3   | P04278        | 42  | P06748        | 81  | P0C0L4        |
| 4   | P04406        | 43  | P06753        | 82  | P0C0L5        |
| 5   | P04430        | 44  | P07195        | 83  | P0CG47        |
| 6   | P04439        | 45  | P07225        | 84  | P62987        |
| 7   | P04792        | 46  | P07237        | 85  | P62979        |
| 8   | P04843        | 47  | P07339        | 86  | P0CG48        |
| 9   | P04908        | 48  | P07355        | 87  | P0DJI8        |
| 10  | Q9BTM1        | 49  | P07357        | 88  | P0DMV8        |
| 11  | Q99878        | 50  | P07358        | 89  | P0DMV9        |
| 12  | Q96KK5        | 51  | P07359        | 90  | P0DOX2        |
| 13  | Q93077        | 52  | P07360        | 91  | P0DOX3        |
| 14  | Q7L7L0        | 53  | P07384        | 92  | P0DOX5        |
| 15  | Q6FI13        | 54  | P07437        | 93  | P0DOX6        |
| 16  | Q16777        | 55  | P07476        | 94  | P0DOX7        |
| 17  | P20671        | 56  | P07477        | 95  | P0DOX8        |
| 18  | P0C0S8        | 57  | P07814        | 96  | P0DOY3        |
| 19  | P05089        | 58  | P07900        | 97  | P0DP01        |
| 20  | P05090        | 59  | P07942        | 98  | P0DP04        |
| 21  | P05091        | 60  | P07996        | 99  | P0DP08        |
| 22  | P05106        | 61  | P08123        | 100 | P0DP23        |
| 23  | P05109        | 62  | P08134        | 101 | P0DP24        |
| 24  | P05120        | 63  | P62745        | 102 | P0DP25        |
| 25  | P05141        | 64  | P61586        | 103 | P0DP57        |
| 26  | Q9H0C2        | 65  | P08514        | 104 | P0DTE1        |
| 27  | P12236        | 66  | P08519        | 105 | P10321        |
| 28  | P12235        | 67  | P08567        | 106 | P10599        |
| 29  | P05154        | 68  | P08572        | 107 | P10619        |
| 30  | P05155        | 69  | P08603        | 108 | P10643        |
| 31  | P05388        | 70  | P08697        | 109 | P10646        |
| 32  | P05556        | 71  | P08727        | 110 | P10809        |
| 33  | P06310        | 72  | P08758        | 111 | P10909        |
| 34  | P06312        | 73  | P08779        | 112 | P11021        |
| 35  | P06396        | 74  | P08865        | 113 | P11047        |
| 36  | P06576        | 75  | P09211        | 114 | P11142        |
| 37  | P06702        | 76  | P09237        | 115 | P11166        |
| 38  | P06703        | 77  | P09493        | 116 | P11169        |
| 39  | P06727        | 78  | P09496        | 117 | Q8TDB8        |

| No. | Protein group | No. | Protein group | No. | Protein group |
|-----|---------------|-----|---------------|-----|---------------|
| 118 | P11171        | 160 | P15924        | 202 | P23142        |
| 119 | P11226        | 161 | P16152        | 203 | P23396        |
| 120 | P11277        | 162 | P16157        | 204 | P23490        |
| 121 | P11279        | 163 | P16520        | 205 | P23526        |
| 122 | P11413        | 164 | Q9HAV0        | 206 | P23528        |
| 123 | P12035        | 165 | P62879        | 207 | P24043        |
| 124 | P12081        | 166 | P62873        | 208 | P24534        |
| 125 | P12109        | 167 | P16671        | 209 | P24666        |
| 126 | P12110        | 168 | P17900        | 210 | P24821        |
| 127 | P12111        | 169 | P17931        | 211 | P24844        |
| 128 | P12259        | 170 | P18206        | 212 | P25311        |
| 129 | P12268        | 171 | P18428        | 213 | P25786        |
| 130 | P12273        | 172 | P19012        | 214 | P25787        |
| 131 | P12277        | 173 | P19013        | 215 | P25788        |
| 132 | P12814        | 174 | P19338        | 216 | P25789        |
| 133 | P12830        | 175 | P19652        | 217 | P26038        |
| 134 | P12955        | 176 | P19823        | 218 | P26599        |
| 135 | P13224        | 177 | P19827        | 219 | P26641        |
| 136 | P13473        | 178 | P19957        | 220 | P27105        |
| 137 | P13489        | 179 | P19971        | 221 | P27169        |
| 138 | P13611        | 180 | P20073        | 222 | P27361        |
| 139 | P13639        | 181 | P20339        | 223 | P28482        |
| 140 | P13645        | 182 | P61020        | 224 | P27482        |
| 141 | P13646        | 183 | P51148        | 225 | P27797        |
| 142 | P13647        | 184 | P20618        | 226 | P27824        |
| 143 | P13671        | 185 | P20742        | 227 | P27918        |
| 144 | P13716        | 186 | P20851        | 228 | P28066        |
| 145 | P13798        | 187 | P20929        | 229 | P28070        |
| 146 | P13929        | 188 | P20930        | 230 | P28072        |
| 147 | P13987        | 189 | P21333        | 231 | P28074        |
| 148 | P14151        | 190 | P21796        | 232 | P29034        |
| 149 | P14174        | 191 | P21926        | 233 | P29373        |
| 150 | P14324        | 192 | P22061        | 234 | P29401        |
| 151 | P14543        | 193 | P22105        | 235 | P29508        |
| 152 | P14618        | 194 | P22234        | 236 | P29622        |
| 153 | P14625        | 195 | P22392        | 237 | P30041        |
| 154 | P14735        | 196 | P22528        | 238 | P30050        |
| 155 | P14770        | 197 | P22531        | 239 | P30086        |
| 156 | P14923        | 198 | P22626        | 240 | P30101        |
| 157 | P15169        | 199 | P22735        | 241 | P31025        |
| 158 | P15531        | 200 | P22792        | 242 | P31146        |
| 159 | P15814        | 201 | P23083        | 243 | P31151        |

| No. | Protein group | No. | Protein group | No. | Protein group |
|-----|---------------|-----|---------------|-----|---------------|
| 244 | P31944        | 286 | P49755        | 328 | P84077        |
| 245 | P31946        | 287 | P49862        | 329 | P61204        |
| 246 | P31949        | 288 | P49908        | 330 | P61224        |
| 247 | P32119        | 289 | P49913        | 331 | P62834        |
| 248 | P32320        | 290 | P50395        | 332 | P61247        |
| 249 | P32926        | 291 | P50452        | 333 | P61626        |
| 250 | P33151        | 292 | P50579        | 334 | P61769        |
| 251 | P35030        | 293 | P51149        | 335 | P61803        |
| 252 | P35222        | 294 | P51571        | 336 | P61978        |
| 253 | P35268        | 295 | P51648        | 337 | P62081        |
| 254 | P35321        | 296 | P51797        | 338 | P62244        |
| 255 | P35443        | 297 | P51991        | 339 | P62258        |
| 256 | P35527        | 298 | P52565        | 340 | P62314        |
| 257 | P35542        | 299 | P52907        | 341 | P62318        |
| 258 | P35555        | 300 | P53367        | 342 | P62805        |
| 259 | P35579        | 301 | P53602        | 343 | P62829        |
| 260 | P35606        | 302 | P53621        | 344 | P62937        |
| 261 | P35754        | 303 | P53634        | 345 | P63104        |
| 262 | P35858        | 304 | P53804        | 346 | P63151        |
| 263 | P35908        | 305 | P54652        | 347 | Q9Y2T4        |
| 264 | P36952        | 306 | P55000        | 348 | P63241        |
| 265 | P36957        | 307 | P55056        | 349 | P63244        |
| 266 | P37837        | 308 | P55058        | 350 | P63261        |
| 267 | P39060        | 309 | P55064        | 351 | P67936        |
| 268 | P40616        | 310 | P55072        | 352 | P68104        |
| 269 | P40926        | 311 | P55786        | 353 | Q5VTE0        |
| 270 | P42357        | 312 | P56182        | 354 | P68363        |
| 271 | P43307        | 313 | P56537        | 355 | P68366        |
| 272 | P45880        | 314 | P58107        | 356 | P68371        |
| 273 | P47712        | 315 | P59665        | 357 | P68431        |
| 274 | P47756        | 316 | P59666        | 358 | Q71DI3        |
| 275 | P47929        | 317 | P60033        | 359 | Q16695        |
| 276 | P48163        | 318 | P60174        | 360 | P84243        |
| 277 | P48668        | 319 | P60660        | 361 | P68871        |
| 278 | P48740        | 320 | P60709        | 362 | P69905        |
| 279 | P49189        | 321 | P60842        | 363 | P78509        |
| 280 | P49257        | 322 | P60900        | 364 | P80108        |
| 281 | P49327        | 323 | P60903        | 365 | P80723        |
| 282 | P49419        | 324 | P61019        | 366 | P81605        |
| 283 | P49720        | 325 | Q8WUD1        | 367 | P99999        |
| 284 | P49721        | 326 | P61026        | 368 | Q01469        |
| 285 | P49748        | 327 | P61106        | 369 | Q01518        |

| No. | Protein group | No. | Protein group | No. | Protein group |
|-----|---------------|-----|---------------|-----|---------------|
| 370 | Q01546        | 412 | Q3SY84        | 454 | Q8WUM4        |
| 371 | Q02413        | 413 | Q3ZCW2        | 455 | Q8WVV4        |
| 372 | Q02487        | 414 | Q4LDE5        | 456 | Q8WWY7        |
| 373 | Q02818        | 415 | Q53G59        | 457 | Q8WWZ8        |
| 374 | Q04695        | 416 | Q53RT3        | 458 | Q92496        |
| 375 | Q04756        | 417 | Q5D862        | 459 | Q92544        |
| 376 | Q06033        | 418 | Q5DT21        | 460 | Q92817        |
| 377 | Q06830        | 419 | Q5T749        | 461 | Q92820        |
| 378 | Q07954        | 420 | Q5T750        | 462 | Q92874        |
| 379 | Q08188        | 421 | Q5T7P3        | 463 | Q92954        |
| 380 | Q08380        | 422 | Q5VVQ6        | 464 | Q969H8        |
| 381 | Q08495        | 423 | Q6E0U4        | 465 | Q96DR8        |
| 382 | Q08554        | 424 | Q6KB66        | 466 | Q96FQ6        |
| 383 | Q08AD1        | 425 | Q6P4A8        | 467 | Q96FW1        |
| 384 | Q09666        | 426 | Q6Q788        | 468 | Q96G03        |
| 385 | Q13093        | 427 | Q6UWN5        | 469 | Q96KN2        |
| 386 | Q13103        | 428 | Q6UWP8        | 470 | Q96L03        |
| 387 | Q13126        | 429 | Q6UX71        | 471 | Q96P63        |
| 388 | Q13201        | 430 | Q6V0I7        | 472 | Q96PD5        |
| 389 | Q13557        | 431 | Q6XPR3        | 473 | Q96QA5        |
| 390 | Q13790        | 432 | Q6ZN30        | 474 | Q96QR8        |
| 391 | Q13835        | 433 | Q6ZNF0        | 475 | Q96RW7        |
| 392 | Q13867        | 434 | Q6ZVX7        | 476 | Q99436        |
| 393 | Q14574        | 435 | Q76LX8        | 477 | Q99456        |
| 394 | Q14697        | 436 | Q7L5L3        | 478 | Q99497        |
| 395 | Q14766        | 437 | Q7Z3Y8        | 479 | Q99715        |
| 396 | Q15063        | 438 | Q7Z4W1        | 480 | Q99832        |
| 397 | Q15149        | 439 | Q7Z794        | 481 | Q9BQ50        |
| 398 | Q15166        | 440 | Q86SQ4        | 482 | Q9BQE3        |
| 399 | Q15323        | 441 | Q86TJ2        | 483 | Q9BTV4        |
| 400 | Q15365        | 442 | Q86UX7        | 484 | Q9BUN1        |
| 401 | Q15485        | 443 | Q86XP0        | 485 | Q9BWD1        |
| 402 | Q15517        | 444 | Q86YZ3        | 486 | Q9BWP8        |
| 403 | Q15582        | 445 | Q8IUE6        | 487 | Q9BXJ4        |
| 404 | Q15646        | 446 | Q8IW75        | 488 | Q9BYJ1        |
| 405 | Q15828        | 447 | Q8IZF2        | 489 | Q9C075        |
| 406 | Q15848        | 448 | Q8N1N4        | 490 | Q9GZZ8        |
| 407 | Q15942        | 449 | Q8NBP7        | 491 | Q9H0E2        |
| 408 | Q16563        | 450 | Q8NDA2        | 492 | Q9H299        |
| 409 | Q16610        | 451 | Q8NEX9        | 493 | Q9H4B7        |
| 410 | Q16658        | 452 | Q8NHM4        | 494 | Q9H4L7        |
| 411 | Q2VY69        | 453 | Q8NI99        | 495 | Q9HBI1        |



| No. | Protein group | No. | Protein group | No. | Protein group |
|-----|---------------|-----|---------------|-----|---------------|
| 496 | Q9HCG7        | 538 | P01871        | 580 | P01011        |
| 497 | Q9HCL0        | 539 | P00738        | 581 | P01701        |
| 498 | Q9HCY8        | 540 | P02655        | 582 | P01764        |
| 499 | Q9HD45        | 541 | O95445        | 583 | A0A087WSY6    |
| 500 | Q9HDC9        | 542 | O43866        | 584 | P01040        |
| 501 | Q9NP78        | 543 | P02675        | 585 | A0A0C4DH35    |
| 502 | Q9NP80        | 544 | P01591        | 586 | O00187        |
| 503 | Q9NQ79        | 545 | P01877        | 587 | P01717        |
| 504 | Q9NSB2        | 546 | P02652        | 588 | A0A0B4J1Y8    |
| 505 | Q9NSB4        | 547 | P01876        | 589 | A0A0C4DH29    |
| 506 | Q9NY33        | 548 | P02671        | 590 | P02545        |
| 507 | Q9NZH8        | 549 | P01023        | 591 | P02745        |
| 508 | Q9NZT1        | 550 | O76011        | 592 | P59665;P59666 |
| 509 | Q9P0W8        | 551 | O14791        | 593 | P01706        |
| 510 | Q9UBW5        | 552 | P02679        | 594 | P01699        |
| 511 | Q9UBX7        | 553 | P04114        | 595 | P02751        |
| 512 | Q9UEW3        | 554 | P01834        | 596 | O95551        |
| 513 | Q9UHD2        | 555 | P01624        | 597 | A0A075B6H9    |
| 514 | Q9UHG3        | 556 | P01772        | 598 | A0A0G2JS06    |
| 515 | Q9UI42        | 557 | P00739        | 599 | P01704        |
| 516 | Q9UIV8        | 558 | P01619        | 600 | A8K2U0        |
| 517 | Q9UJ70        | 559 | P02768        | 601 | A1L4H1        |
| 518 | Q9UKK9        | 560 | P00736        | 602 | A0A0B4J1U7    |
| 519 | Q9UL25        | 561 | A0A075B6I0    | 603 | O75223        |
| 520 | Q9ULV4        | 562 | A0A0A0MRZ8    | 604 | P01019        |
| 521 | Q9UM47        | 563 | P04433        | 605 | P01718        |
| 522 | Q9Y251        | 564 | P01859        | 606 | P01766        |
| 523 | Q9Y274        | 565 | P01780        | 607 | P01024        |
| 524 | Q9Y3R4        | 566 | A0A075B6S2    | 608 | A0A075B6K4    |
| 525 | Q9Y446        | 567 | A2NJV5        | 609 | P01705        |
| 526 | Q9Y490        | 568 | A0A0C4DH25    | 610 | A0A075B6I9    |
| 527 | Q9Y617        | 569 | O75830        | 611 | A0A075B6P5    |
| 528 | Q9Y6C2        | 570 | O75636        | 612 | P01615        |
| 529 | Q9Y6R7        | 571 | A0A0B4J1X5    | 613 | O95867        |
| 530 | Q9Y6Z7        | 572 | P01700        | 614 | A0A075B6R9    |
| 531 | P02533        | 573 | P04211        | 615 | A0A0C4DH68    |
| 532 | P04259        | 574 | P01009        | 616 | A0A0J9YX35    |
| 533 | P02538        | 575 | P02747        | 617 | A0A0C4DH73    |
| 534 | P02649        | 576 | A0A0B4J1V6    | 618 | P01611        |
| 535 | P04003        | 577 | P01709        | 619 | P01042        |
| 536 | P02656        | 578 | P02746        | 620 | P01833        |
| 537 | P02647        | 579 | A0A0B4J1Y9    | 621 | P00338        |

| No. | Protein group | No. | Protein group | No. | Protein group |
|-----|---------------|-----|---------------|-----|---------------|
| 622 | A0A0A0MT36    | 664 | A0A0C4DH36    | 706 | P01597        |
| 623 | P02760        | 665 | P04062        | 707 | P04432        |
| 624 | P01714        | 666 | P04075        | 708 | O75340        |
| 625 | O14556        | 667 | O75608        | 709 | O76013        |
| 626 | P01599        | 668 | P02787        | 710 | P02763        |
| 627 | A0A0B4J1X8    | 669 | O75342        | 711 | P02795        |
| 628 | P01593        | 670 | A0A0C4DH24    | 712 | Q8N339        |
| 629 | P01594        | 671 | P00558        | 713 | P80297        |
| 630 | O14818        | 672 | A0A087WSY4    | 714 | P13640        |
| 631 | A0A0C4DH31    | 673 | A0A0A0MS15    | 715 | P04732        |
| 632 | P01601        | 674 | O75131        | 716 | P04083        |
| 633 | O43240        | 675 | P01817        | 717 | P01889        |
| 634 | P04004        | 676 | P04040        | 718 | P02730        |
| 635 | A0A075B6K0    | 677 | O60701        | 719 | A0A0B4J1V1    |
| 636 | P01703        | 678 | A0A0C4DH38    | 720 | P01743        |
| 637 | A0A0B4J1V0    | 679 | P04217        | 721 | P00747        |
| 638 | A0A075B6S5    | 680 | O95969        | 722 | O75874        |
| 639 | O14732        | 681 | P02788        | 723 | P02749        |
| 640 | P01860        | 682 | P01893        | 724 | O75635        |
| 641 | A0A2R8Y619    | 683 | A6NM28        | 725 | A0A0C4DH43    |
| 642 | Q99880        | 684 | P01602        | 726 | A0A087WSX0    |
| 643 | Q99879        | 685 | P01008        | 727 | A0A0C4DH67    |
| 644 | Q99877        | 686 | P04196        | 728 | A0A0C4DH69    |
| 645 | Q96A08        | 687 | A0A0C4DH32    | 729 | P02790        |
| 646 | Q93079        | 688 | A0A075B6I1    | 730 | O43175        |
| 647 | Q8N257        | 689 | A0A0B4J2D9    | 731 | P00450        |
| 648 | Q5QNW6        | 690 | P0DP09        | 732 | P02042        |
| 649 | Q16778        | 691 | P04180        | 733 | A0A075B6R2    |
| 650 | P62807        | 692 | P02766        | 734 | P02776        |
| 651 | P58876        | 693 | P02654        | 735 | P01715        |
| 652 | P57053        | 694 | A0A0C4DH34    | 736 | P02549        |
| 653 | P33778        | 695 | A0A0A0MS14    | 737 | A0A075B6S6    |
| 654 | P23527        | 696 | P02748        | 738 | O60259        |
| 655 | P06899        | 697 | O95810        | 739 | P01861        |
| 656 | O60814        | 698 | E9PAV3        | 740 | A0A0C4DH42    |
| 657 | A0A075B6K5    | 699 | Q13765        | 741 | P01767        |
| 658 | A0A075B6J9    | 700 | A0A075B6Q5    | 742 | P02452        |
| 659 | P02765        | 701 | O75369        | 743 | P00734        |
| 660 | P00966        | 702 | P02743        | 744 | P02462        |
| 661 | O43548        | 703 | P01721        | 745 | O95147        |
| 662 | P00441        | 704 | P03973        | 746 | O00571        |
| 663 | A0A0J9YXX1    | 705 | P01031        | 747 | A0A2R8Y4L2    |

| No. | Protein group | No. | Protein group | No. | Protein group |
|-----|---------------|-----|---------------|-----|---------------|
| 748 | P09651        | 751 | P00748        | 754 | O76014        |
| 749 | P02775        | 752 | P00488        | 755 | O15145        |
| 750 | P00491        | 753 | A0M8Q6        | 756 | P02774        |

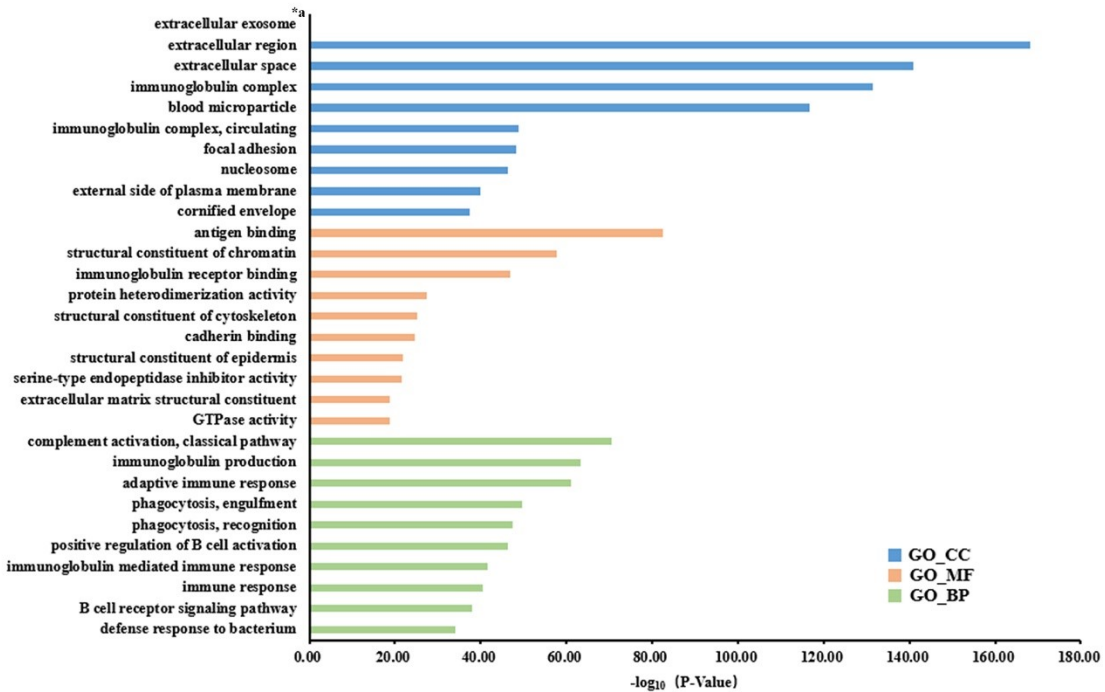

Fig. S2 GO enrichment analysis of the total identified exosomal proteins prepared by the four methods under cellular component, biological process and molecular function.

\*<sup>a</sup> Since the p-value of extracellular exosome is 0.0, the  $-\log_{10}(\text{P-value})$  is infinite.
