# Supplementary figures and images for: A comparison of size exclusion chromatography-based tandem strategies for plasma exosome enrichment and proteomic analysis
Source: Royal Society of Chemistry journal article supplement (doi:10.1039/d3ay01704d), 2023-01-01

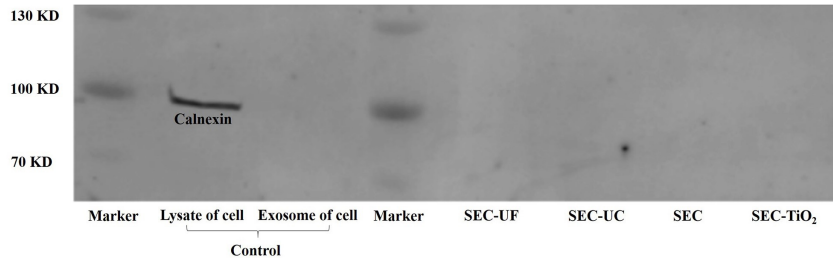

Supplement: d3ay01704d3.pdf [file d3ay01704d3.pdf]

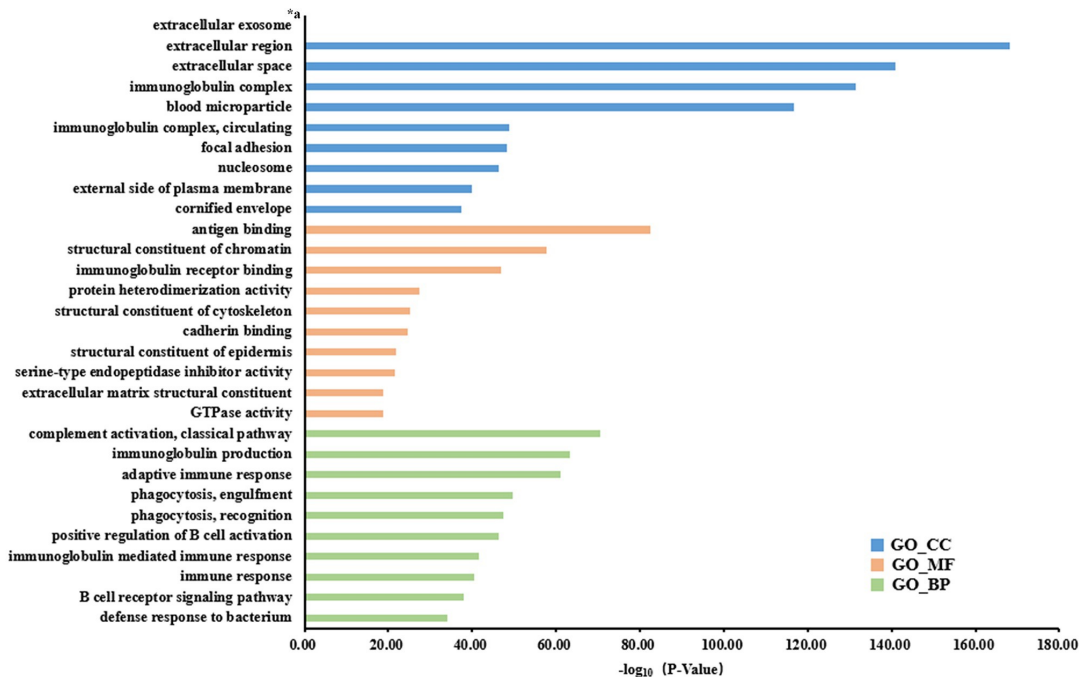

Supplement: d3ay01704d4.pdf [file d3ay01704d4.pdf]
